# Supplementary material for: MoP2/C@rGO synthesised by phosphating the molybdenum-based metal organic framework and GO coating with excellent lithium ion storage performance
Source: Royal Society of Chemistry journal article supplement (doi:10.1039/d2dt00604a), 2022-01-01
Supplement: d2dt00604a1.pdf [file d2dt00604a1.pdf]

## Supplementary Materials

MoP<sub>2</sub>/C@rGO formed by the molybdenum-based metal organic framework of the phosphating GO coating with excellent lithium ion storage performance

Jiakai Du<sup>†</sup>, Changjian He<sup>†</sup>, Qingmeng Li, Jiali Chai, Qianqian Zhang  
Bohejin Tang<sup>#</sup> and Yichuan Rui<sup>#</sup>

*College of Chemistry and Chemical Engineering, Shanghai University of Engineering Science, Shanghai 201620, PR China*

*<sup>†</sup>J. D. and C.H. contributed equally to this work.*

*<sup>#</sup>Corresponding author: [tangbohejin@sues.edu.cn](mailto:tangbohejin@sues.edu.cn), [ryc713@126.cn](mailto:ryc713@126.cn).*

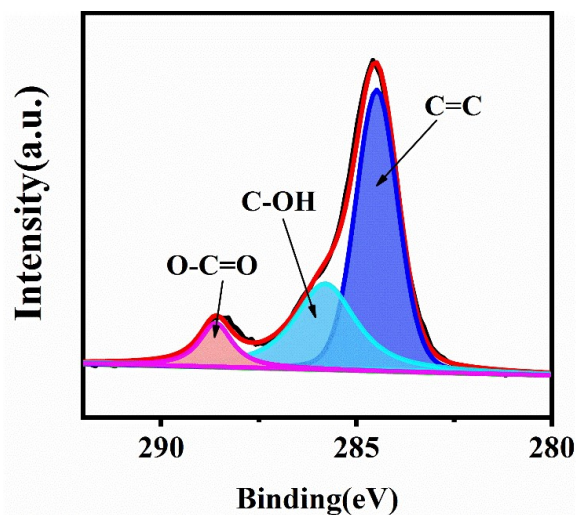

**Fig.S1** C1s peak in MoP<sub>2</sub>/C@rGO

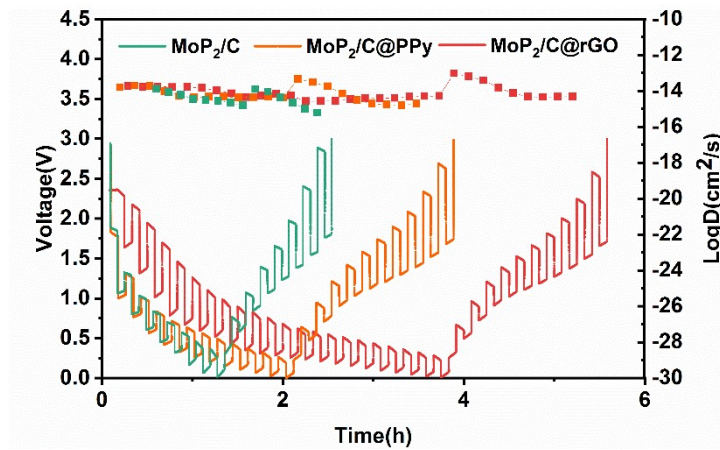

**Fig.S2** GITT curves and the corresponding Li-ion diffusion coefficient of MoP<sub>2</sub>/C, MoP<sub>2</sub>/C@PPy and MoP<sub>2</sub>/C@rGO

The Li ions diffusion coefficient ( $D_{Li^+}$ ) in MoP<sub>2</sub>/C, MoP<sub>2</sub>/C@PPy and MoP<sub>2</sub>/C@rGO electrodes is studied by Galvanostatic Intermittent Titration Technique (GITT) measurements. The  $D_{Li^+}$  values of discharge and charge process were calculated as the following.

$$D_{GITT} = \frac{4}{\pi\tau} \left( \frac{m_b V_M}{M_b S} \right)^2 \left( \frac{\Delta E_s}{\Delta E_t} \right)^2 \quad (\tau \ll l^2 / D_{GITT})$$

Where  $\tau$  and  $S$  represent the constant current pulse duration time (s) and the area (cm<sup>2</sup>) for electrochemical reaction under current collector.  $M_b$ ,  $m_b$  and  $V_M$  stands for molar mass (g mol<sup>-1</sup>), mass (g) and molar volume (cm<sup>3</sup> mol<sup>-1</sup>) of electrode active material.  $\Delta E_s$  and  $\Delta E_t$  represent the change in the steady-state voltage at a single-step GITT test (V) and the total change in cell voltage during current pulse time, respectively.

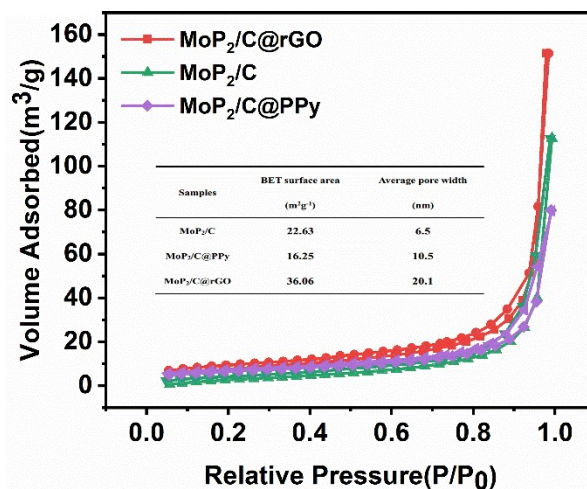

**Fig.S3** Nitrogen adsorption/desorption isotherms and corresponding pore size distribution curves of MoP<sub>2</sub>/C, MoP<sub>2</sub>/C@PPy and MoP<sub>2</sub>/C@rGO

**Table.S1** Carbon contents

| Samples                 | M <sub>1</sub> (g) | M <sub>2</sub> (g) | carbon contents (%) |
|-------------------------|--------------------|--------------------|---------------------|
| MoP <sub>2</sub> /C     | 1.0255             | 0.1015             | ~9.90               |
| MoP <sub>2</sub> /C@PPy | 1.0255             | 0.1856             | ~18.1               |
| MoP <sub>2</sub> /C@rGO | 1.0255             | 0.1907             | ~18.6               |

M<sub>1</sub>(g): the mass before acidification M<sub>2</sub>(g): the mass after acidification

As shown in **Table.S1**, carbon contents of three samples are calculated by the mass before and after acidification. The carbon contents of MoP<sub>2</sub>/C, MoP<sub>2</sub>/C@PPy and MoP<sub>2</sub>/C@rGO are 9.9%, 18.1% and 18.6%, respectively,

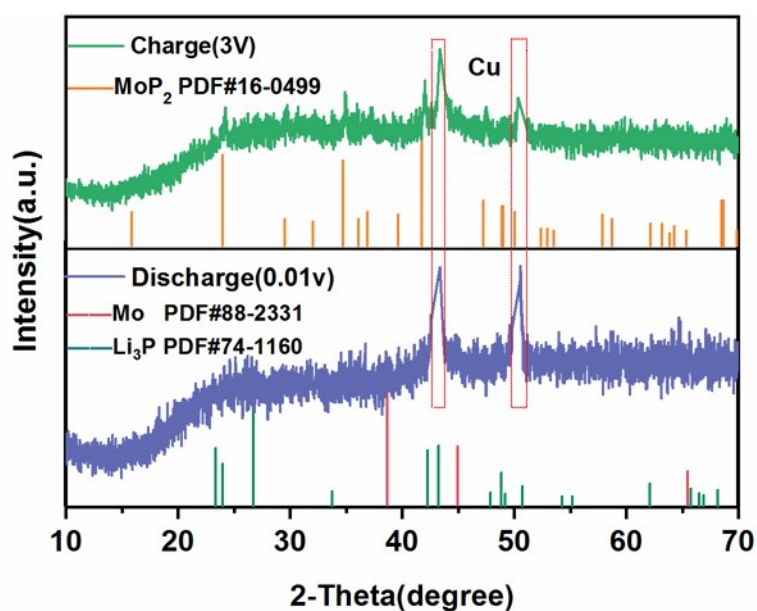**Fig.S4** XRD patterns after cycling.

As shown in the **Fig.S4**, the XRD diffraction peaks of Mo (**PDF#88-2331**) and Li<sub>3</sub>P (**PDF#74-1160**) appear in the discharge process along with the disappearance of the principal diffraction peak of MoP<sub>2</sub>, which confirms that Mo and Li<sub>3</sub>P are generated through the electrochemical reaction between the electrode material and Li. During the charging process, the XRD diffraction peaks of MoP<sub>2</sub> (**PDF#16-0499**) show that Li escapes from the electrode material.

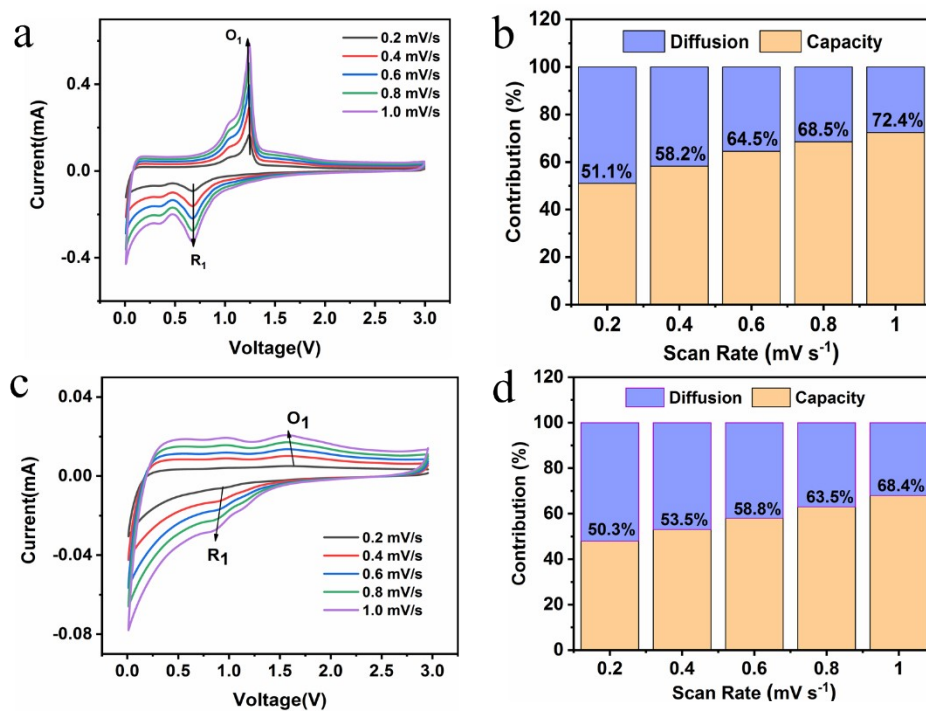

**Fig.S5** (a-c) CV curves of MoP<sub>2</sub>/C@PPy and MoP<sub>2</sub>/C (0.2 to 1.0 mV s<sup>-1</sup>) and (b-d) the percentage of pseudo capacitive contribution from 0.2 to 1.0 mV/s.
